## RESEARCH ARTICLE

# Seasonal and sex-related variation in vitamin D status and its association with other biochemical markers in young individuals: A cross-sectional study

Marcela Moraes Mendes<sup>1,2</sup>\*, Maísa Miranda Araújo<sup>1</sup>, Patrícia Borges Botelho<sup>1</sup>, Kênia Mara Baiocchi de Carvalho<sup>1</sup>

**1** Department of Nutrition, Graduate Program in Human Nutrition, University of Brasilia, Brasília, Federal District, Brazil, **2** Postgraduate Program, Faculty of Nutrition, Federal University of Goias, Goiania/GO, Brazil

\* These authors contributed equally to this work.

\* [mendesmarcelam@gmail.com](mailto:mendesmarcelam@gmail.com)

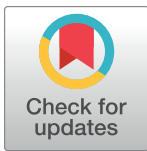

## Abstract

### OPEN ACCESS

**Citation:** Mendes MM, Araújo MM, Botelho PB, de Carvalho KMB (2024) Seasonal and sex-related variation in vitamin D status and its association with other biochemical markers in young individuals: A cross-sectional study. PLoS ONE 19(3): e0298862. <https://doi.org/10.1371/journal.pone.0298862>

**Editor:** Ozra Tabatabaei-Malazy, Endocrinology and Metabolism Population Sciences Institute, Tehran University of Medical Sciences, ISLAMIC REPUBLIC OF IRAN

**Received:** May 29, 2023

**Accepted:** February 1, 2024

**Published:** March 29, 2024

**Copyright:** © 2024 Mendes et al. This is an open access article distributed under the terms of the [Creative Commons Attribution License](https://creativecommons.org/licenses/by/4.0/), which permits unrestricted use, distribution, and reproduction in any medium, provided the original author and source are credited.

**Data Availability Statement:** All relevant data are within the article and are also accessible in the OSF repository at <https://osf.io/KNWxj/>.

**Funding:** MMM and MMA received financial support from the Brazilian National Council for Scientific and Technological Development (URL: <https://www.gov.br/cnpq/pt-br>) through a Postdoctoral Fellowship (151325/2019-7) and a

## Background

While several studies have investigated the association between vitamin D deficiency and biochemical parameters, the results are still inconsistent and mostly overlook seasonal variations. This study explored the relationships between 25-hydroxy-vitamin D (25(OH)D) concentrations, biochemical markers, and seasonal variation among young males and females.

## Methods

A cross-sectional study was conducted among 203 individuals aged 18–24 years of both sexes residing in Brasilia, Brazil (latitude: 15°S). Sociodemographic variables, season of blood collection, and serum levels of 25(OH)D, total cholesterol, HDL-cholesterol, LDL-cholesterol, triglycerides, glycated hemoglobin (HbA1c), glucose, insulin, hs-CRP, parathyroid hormone, ionized calcium, and alkaline phosphatase were included. Descriptive statistics and differences among groups, correlations, and linear regression tests were performed.

## Results

The mean age of the participants was 21.17±1.7 years, and the mean serum 25(OH)D level was 25.76±7.0 ng/mL. Of the participants, 50.7% had vitamin D insufficiency (20 to 29.9 ng/mL), and 23.2% were vitamin D deficient (≤20 ng/mL). Vitamin D deficiency was higher in the spring (53.2%) and among females (29.5%). In young men with vitamin D insufficiency/deficiency (≤29.9 ng/mL) (n = 49), 25(OH)D levels were inversely correlated with HOMA-β (r = -0.234, p = 0.032) and triglyceride (r = -0.415, p = 0.003) levels. However, there were no significant correlations between 25(OH)D concentrations and biochemical markers among women with insufficient and deficient vitamin D levels.

doctoral fellowship (88887.798670/2022-00) respectively. The funders had no role in study design, data collection and analysis, decision to publish, or preparation of the manuscript.

**Competing interests:** The authors have declared that no competing interests exist.

## Conclusion

This study found a high prevalence of vitamin D insufficiency/deficiency among young individuals living in Brasília, Brazil, particularly women and during the spring season. Our findings suggest that lower 25(OH)D levels ( $<29.9$  ng/mL) may be associated with insulin resistance and an increased risk of cardiovascular disease in young men studied. However, further studies with larger representative samples are needed to explore the mechanisms underlying the association between vitamin D and biochemical parameters.

## Introduction

Vitamin D is primarily obtained through endogenous synthesis (80–90%), which occurs via ultraviolet B (UVB) radiation on the epidermis, as well as from dietary sources [1]. Given the critical role of sunlight exposure in maintaining vitamin D levels, it was previously assumed that hypovitaminosis D would not be a concern in populations residing in lower latitude countries, where there is minimal seasonal variation in sunlight availability throughout the year. However, recent research has demonstrated that vitamin D deficiency [2] remains prevalent in the general population, not only in high-latitude regions with marked seasonal fluctuations but also in low-latitude countries [3–6].

Although vitamin D deficiency has received greater attention in older populations [7], young individuals may also be at risk for this condition, even in low-latitude countries such as Brazil [8]. Furthermore, the lifestyle transition experienced by this age group may contribute to an increased risk of metabolic syndrome and cardiovascular diseases, which may be exacerbated by vitamin D deficiency [9].

The relationship between vitamin D status and biochemical markers, such as lipid, glyce-mic, and inflammatory profiles, has been studied in the general young population, however, it remains divergent [9]. For example, some studies have reported a significant association between vitamin D deficiency and higher levels of glucose, HOMA-IR, triglycerides, low-density lipoprotein (LDL), total cholesterol, and high-density lipoprotein (HDL) in adolescents and young adults [10–14]. Conversely, other published studies have found no relationship between vitamin D status and glucose, HDL, triglycerides, LDL, and cholesterol among adolescents [11, 13, 14]. This discrepancy may be due to variations in vitamin D thresholds used, population age, sex, and seasonal variations, which were not considered as influential factors in most published studies.

Several studies have indicated significant variations in 25(OH)D concentrations and the varying effects of vitamin D on disease outcomes among women and men [15–17]. This sex-related variation was believed to occur due to the difference in body fat mass content between the sexes [18]. However, recent analyses indicated that this difference might also be influenced by other factors, such as sun exposure habits, dietary intake, and different hormonal profiles between men and women [19]. Furthermore, these findings suggested that vitamin D supplementation should be considered sex-specific [19, 20]. Nevertheless, most studies investigating the impact of vitamin D on health have not considered sex as a crucial factor.

To date, only a few studies have evaluated the seasonal variations and sex-related differences in vitamin D status among healthy young adults living in low-latitude regions. Additionally, the effect of low vitamin D status on biochemical markers in this population remains unclear. Therefore, this cross-sectional study aimed to (a) analyze the serum concentrations of 25(OH)D in healthy young adults living in a low-latitude country during different seasons of

the year; (b) determine the sex differences in serum 25(OH)D concentrations; and (c) investigate the association between vitamin D status and biochemical markers in young, healthy adults.

## Material and methods

### Study design and population

This cross-sectional study analyzed data ( $n = 203$ ) from individuals recruited through an active search in a database of previous protocols and those who met the selection criteria were invited to participate in the present study, in addition to the invitation through social media. The inclusion criteria required young adults of both sexes, aged 18–24 years, and residing in the Federal District (latitude: 15°S), Brazil. Participants without serum 25(OH)D concentrations were excluded. The Federal District has a tropical savanna climate, with temperatures ranging from  $\sim 13^{\circ}\text{C}$  to  $\sim 35^{\circ}\text{C}$  throughout the year. In this region, the four seasons are not well defined, and there are mainly two seasons, the rainy season from October to March and the dry season from April to September. Data collection began in August 2019 but was suspended in March 2020 due to the COVID-19 pandemic. The study was conducted in accordance with the Helsinki Declaration guidelines and was approved by the Ethics Committee of the executing institution (CAAE:05185212.2.1001.5286). All participants were informed about the study and provided written consent. Authors did not have access to information that could identify individual participants during or after data collection.

### Demographic and biochemical parameters

Sociodemographic variables, including sex, age, and season of blood collection, were collected during blood sampling. Participants were instructed to fast for 10–12 hours prior to blood collection. Blood collection occurs during the Brazilian winter, spring, and summer months and each participant collects blood samples only once. All blood samples were stored refrigerated ( $0\text{--}10^{\circ}\text{C}$ ) until analysis. The following biomarkers were measured: total cholesterol, HDL-cholesterol, LDL-cholesterol, triglycerides, glycated hemoglobin (HbA1c), glucose, insulin, vitamin D, hs-CRP, parathyroid hormone (PTH), ionized calcium, and alkaline phosphatase. Cholesterol (mg/dL) was assessed by enzymatic kinetics, insulin (mU/L) by chemiluminescence, glucose (mg/dL) by the hexokinase method, HbA1c by ion-exchange chromatography, triglycerides (mg/dL) by kinetics, LDL-c and HDL-c by enzymatic colorimetric assay and intact PTH by electrochemiluminescence. Concentrations of 25(OH)D were assessed by chemiluminescence assay. The homeostasis model assessment index (HOMA-IR) was calculated using the following equation:  $[\text{fasting insulin concentration (U/L)} \times \text{fasting glucose concentration (mg/dL)}] / 405$ , and  $\beta$  HOMA-beta (%) by  $= [20 \times \text{fasting insulin concentration (mU/L)}] / [\text{fasting glucose concentration (mmol/L)} - 3.5]$ . Castelli's risk index-I and II were calculated as  $\text{total cholesterol (mg/dL)} / \text{HDL-c (mg/dL)}$  and  $\text{LDL-c (mg/dL)} / \text{HDL-c (mg/dL)}$ , respectively.

**Statistical analysis.** Variables are described as mean and standard deviation (SD). The Kolmogorov-Smirnov test assessed the normality distribution of variables. The independent variable 25(OH)D levels were categorized into the following thresholds: deficiency  $< 20$  ng/mL; an insufficiency: 20 to 29.99 ng/mL and optimal  $\geq 30$  ng/mL in accordance with the US Endocrine Society [21] and the Position Statement Society for Adolescent Health and Medicine recommendation [22].

The study evaluated the distribution of variables of interest with respect to sex, vitamin D thresholds, and season. The association between sex and biochemical markers was analyzed using the Mann-Whitney test, while the Kruskal-Wallis test was used to assess the association

between vitamin D thresholds and biochemical markers. The  $\chi^2$ -test was employed to determine the relationship between 25(OH)D concentration thresholds, sex, and season. Spearman correlation was used to explore the association between 25(OH)D status and biochemical markers. Standard linear regression models were utilized to investigate the predictive ability of vitamin D concentrations. The statistical analysis was performed using SPSS software for Windows (version 26.0, 2019; IBM Corp, Armonk, NY, USA), and statistical significance was defined as a p-value less than 0.05.

Post-hoc sample power was calculated using the G\*Power software (version 3.1), based on the difference in serum 25(OH)D concentration between males ( $n = 71$ ) and females ( $n = 132$ ). We obtained a sample power of 81%, assuming the effect size of 0.429 and  $\alpha$  error of 0.05.

## Results

A total of 259 individuals were invited to participate in the study, of those 56 were excluded due to the lack of 25(OH)D data. Overall, 203 participants were enrolled in the study, of whom 132 (65%) were women and 71 (35%) were men. The population characteristics and biochemical profile are presented in [Table 1](#). The mean age of the participants was  $21.17 \pm 1.7$  years, and there was no significant difference in age between women and men ( $p = 0.776$ ). The majority of the participants (54.2%) provided blood samples during winter, followed by spring (40.4%), and only a small proportion during summer (5.4%). The winter season was the most frequent sampling period for men (50.7%) and women (61.4%) ( $p = 0.016$ ).

Compared to men, women had higher mean concentrations of HDL-c ( $54.66 \pm 11.3$  mg/dL vs  $48.30 \pm 10.01$  mg/dL;  $p < 0.001$ ), insulin ( $10.15 \pm 7.1$   $\mu$ UI/mL vs  $8.48 \pm 4.8$   $\mu$ UI/mL;  $p = 0.037$ ), and HOMA- $\beta$  ( $231.59 \pm 146.7$  vs  $154.79 \pm 67.8$ ;  $p < 0.01$ ) ([Table 1](#)). Conversely, men had a higher mean concentration of blood glucose than women ( $81.04 \pm 8.0$  mg/dL vs  $79.44 \pm 6.8$  mg/dL;  $p = 0.020$ ). Among all subjects, 11.6% presented insulin resistance according to HOMA-IR.

## Sex-related variation

Total mean vitamin D concentration was  $25.76 \pm 7.0$  ng/mL. Men had higher mean serum vitamin D concentrations than women ( $27.70 \pm 7.2$  ng/mL vs  $24.71 \pm 6.7$  ng/mL,  $p = 0.004$ ). Only 26.1% of the sample had optimal vitamin D levels, with women having a lower prevalence than men (23.5% vs 31.0%) ([Fig 1](#)). Vitamin D insufficiency was observed in 50.7% of the sample, while 23.2% were vitamin D deficient. Vitamin D deficiency was more prevalent in women (29.5%) compared to men (11.3%) [ $\chi^2(2) = 8,713$ ;  $p = 0.013$ ].

## Seasonal variance

There was a significant association between the 25(OH)D threshold and season, for both women ( $p < 0.045$ ) and men ( $p < 0.011$ ). The proportion of deficient women (41.3%) and insufficient men (72.2%) was higher in samples collected during spring compared to those collected during winter (23.5% for women and 34.5% for men) ([Table 2](#)).

Moreover, the mean serum 25(OH)D concentration during winter was significantly higher than that during spring for both women ( $25.7 \pm 6.8$  ng/mL in winter vs  $22.6 \pm 5.4$  ng/mL in spring,  $p = 0.002$ ) and men ( $30.7 \pm 7.2$  ng/mL in winter vs  $25.1 \pm 6.3$  ng/mL in spring,  $p = 0.001$ ). In men, the mean serum 25(OH)D concentration during winter ( $30.7 \pm 7.2$  ng/mL) was above the sufficiency threshold of 30 ng/mL ([Table 2](#)).

**Table 1. Characterization of the study population (n = 203).**

| Variables                 | Females (n = 132) | Males (n = 71) | Total (n = 203) | p-Value <sup>†</sup> |
|---------------------------|-------------------|----------------|-----------------|----------------------|
| Age, years                | 21.19 ± 1.2       | 21.21 ± 1.8    | 21.17 ± 1.7     | 0.776                |
| Seasons                   |                   |                |                 |                      |
| Winter                    | 81 (73.6%)        | 29 (26.4%)     | 110 (54.2%)     | 0.016 <sup>††</sup>  |
| Spring                    | 46 (56.1%)        | 36 (43.9%)     | 82 (40.4%)      |                      |
| Summer                    | 5 (45.5%)         | 6 (54.5%)      | 11 (5.4%)       |                      |
| Total cholesterol, mg/dL  | 160.1 ± 30.1      | 157.39 ± 35.4  | 159.15 ± 32.0   | 0.368                |
| Triglycerides, mg/dL      | 86.48 ± 11.3      | 81.96 ± 31.0   | 84.90 ± 39.6    | 0.950                |
| LDL-c, mg/dL              | 91.33 ± 25.6      | 96.35 ± 33.5   | 93.08 ± 29.2    | 0.474                |
| HDL-c, mg/dL              | 54.66 ± 11.3      | 48.30 ± 10.01  | 52.43 ± 11.2    | <0.001               |
| Non-HDL-, mg/dL           | 105.44 ± 27.8     | 109.10 ± 34.3  | 106.72 ± 30.2   | 0.642                |
| Castelli risk index-I     | 3.14 ± 0.8        | 3.37 ± 0.9     | 3.016 ± 0.7     | 0.007                |
| Castelli risk index-II    | 1.86 ± 0.7        | 2.1 ± 0.9      | 1.74 ± 0.6      | 0.005                |
| Insulin, µUI/mL           | 10.15 ± 7.1       | 8.48 ± 4.8     | 9.56 ± 6.4      | 0.037                |
| Blood Glucose, mg/dL      | 79.44 ± 6.8       | 81.04 ± 8.0    | 80.00 ± 0.5     | 0.020                |
| HOMA-IR (n = 189)         | 2.09 ± 1.5        | 1.75 ± 1.0     | 1.98 ± 1.4      | 0.086                |
| HOMA-β                    | 231.59 ± 146.7    | 154.79 ± 67.8  | 205.58 ± 130.7  | <0.001               |
| HbA1c                     | 5.15 ± 0.2        | 5.20 ± 0.3     | 5.17 ± 0.2      | 0.187                |
| hs-CRP, mg/dL (n = 195)   | 0.37 ± 0.9        | 0.15 ± 0.2     | 0.29 ± 0.8      | 0.296                |
| PTH, pg/mL                | 28.70 ± 9.1       | 27.58 ± 9.1    | 28.30 ± 9.1     | 0.226                |
| Alkaline phosphatase, U/L | 64.61 ± 17.5      | 79.77 ± 22.8   | 69.91 ± 20.8    | <0.001               |
| Ionized calcium, mmol/L   | 1.16 ± 0.04       | 1.15 ± 0.03    | 1.16 ± 0.04     | 0.026                |

Values are mean ± SD or n (%). High-density lipoprotein (HDL-c); Homeostasis model assessment (HOMA index) was calculated as fasting insulin (mU/L) × fasting glucose (mg/dL)/405. Castelli risk index-I and II was calculated as total cholesterol/HDL-c and LDL-c/HDL-c, respectively.

† Mann-Whitney test, unless said otherwise.

†† Chi-Square test.

<https://doi.org/10.1371/journal.pone.0298862.t001>

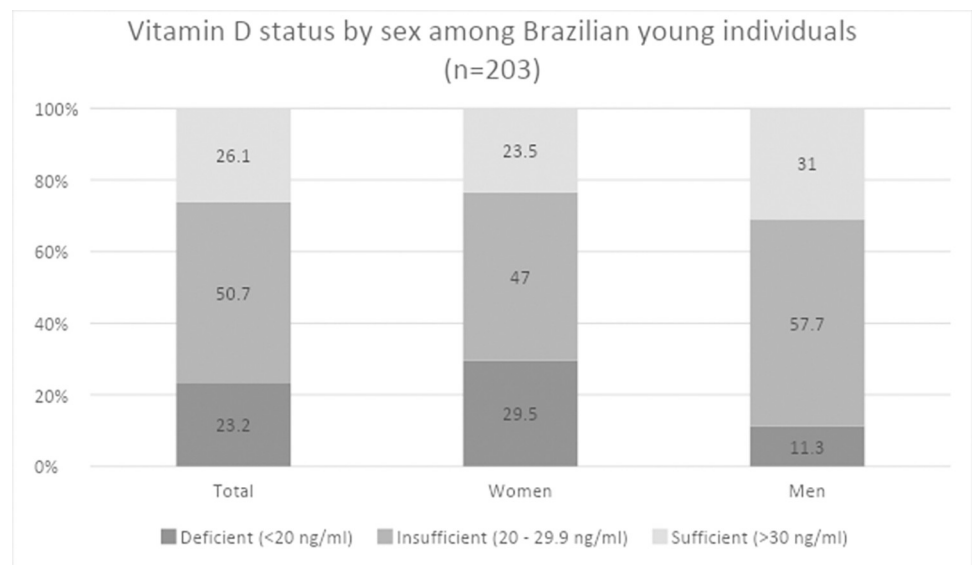

**Fig 1. Vitamin D status by sex among young Brazilian individuals (n = 203).** Statistical analysis: <sup>1</sup> Chi-square test between women and men.

<https://doi.org/10.1371/journal.pone.0298862.g001>

**Table 2. Serum concentrations and 25(OH)D status by season in Brazilian young women (n = 127) and men (n = 55).**

|                  | Females         |                 |                    | Males           |                 |                      |
|------------------|-----------------|-----------------|--------------------|-----------------|-----------------|----------------------|
|                  | Winter (n = 81) | Spring (n = 46) | p-Value            | Winter (n = 29) | Spring (n = 36) | p-Value              |
| 25(OH)D, ng/mL   | 25.7 ± 6.8      | 22.6 ± 5.4      | 0.011 <sup>1</sup> | 30.7 ± 7.2      | 25.1 ± 6.3      | < 0.001 <sup>1</sup> |
| Vitamin D Status |                 |                 |                    |                 |                 |                      |
| <20 ng/mL        | 19 (23.5)       | 19 (41.3)       | 0.045 <sup>2</sup> | 2 (6.9)         | 6 (16.7)        | < 0.001 <sup>2</sup> |
| 20–29.99 ng/mL   | 39 (48.1)       | 21 (45.7)       |                    | 10 (34.5)       | 26 (72.2)       |                      |
| ≥ 30 ng/mL       | 23 (28.4)       | 6 (13.0)        |                    | 17 (58.6)       | 4 (11.1)        |                      |

Values are expressed in mean ± SD or n (%). Participants with blood collection during summer were excluded from this analysis due to the small sample size for this subgroup.

† Mann-Whitney test, unless said otherwise.

†† Chi-Square test.

<https://doi.org/10.1371/journal.pone.0298862.t002>

### Vitamin D status and biochemical markers

Upon analysing the biochemical profile based on vitamin D status and sex, no significant association was observed between vitamin D thresholds and age or any of the biochemical markers for both women (see [S1 Table](#)). For women, there were no significant correlations between serum 25(OH)D concentrations and biochemical markers, except for a negative correlation with HOMA-β (r = -0.222; p = 0.012) when all women were included in the analysis. However, this correlation was not observed when only evaluating data from participants with vitamin D insufficiency and deficiency ([Table 3](#)).

In men, the total sample showed an inverse correlation between vitamin D concentration and total cholesterol (r = -0.252; p = 0.034) and LDL (r = -0.235; p = 0.032) ([Table 3](#)). When analysing only participants with vitamin D insufficiency and deficiency (n = 49), an inverse correlation was found between 25(OH)D levels and HOMA-β (r = -0.234, p = 0.032) and triglycerides (r = -0.415, p = 0.003) ([Table 3](#)).

Linear regression models for men with vitamin D insufficiency and deficiency (n = 49) showed that vitamin D concentrations accounted for 10% of the total variance in HOMA-β (p = 0.029), with concentrations decreasing by 0.015 for each additional ng/ml of 25(OH)D, and 8% of the total variance in LDL (p = 0.041), with concentrations decreasing by 0.105 for each additional ng/ml of 25(OH)D. The model for total cholesterol did not reach statistical significance.

### Discussion

This study reveals a significant proportion (73.9%) of young individuals living in Brasília, Brazil with suboptimal vitamin D levels. The prevalence of this condition was higher among females and during the spring season. Among male participants with vitamin D insufficiency and deficiency, lower vitamin D concentrations correlated with elevated HOMA-β, triglycerides, and Castelli's risk index-II. Our findings are consistent with previous reports of a high prevalence of hypovitaminosis D in young people residing in sunny countries [[23](#), [24](#)]. Despite the abundance of UVB radiation in tropical countries, which is higher than in high-latitude countries, lifestyle factors that affect sunlight exposure frequency and intensity may have contributed significantly to the observed high prevalence of hypovitaminosis D [[25](#), [26](#)].

Previous studies have reported lower vitamin D concentrations in females compared to age-matched males, as also observed in our study [[19](#)]. This difference in vitamin D status may be attributed to the higher subcutaneous fat content present in women [[19](#)]. Additionally, since serum 25(OH)D is a fat-soluble molecule, it can be stored in adipose tissue, leading to



Table 3. Correlation between serum 25(OH)D concentrations and biochemical markers in Brazilian young women and men (n = 132).

| Biochemical Markers       | 25(OH)D           |       |                                                                              |       |                |       |                                                                           |       |
|---------------------------|-------------------|-------|------------------------------------------------------------------------------|-------|----------------|-------|---------------------------------------------------------------------------|-------|
|                           | Females (n = 132) |       | Females with 25(OH)D insufficiency and deficiency, without control (n = 101) |       | Males (n = 71) |       | Males with 25(OH)D insufficiency and deficiency, without control (n = 49) |       |
|                           | r                 | p     | r                                                                            | p     | r              | p     | r                                                                         | p     |
| Blood Glucose, mg/dL      | 0.085             | 0.345 | 0.078                                                                        | 0.441 | 0.224          | 0.061 | 0.247                                                                     | 0.087 |
| Insulin, $\mu$ UI/mL      | -0.099            | 0.260 | -0.082                                                                       | 0.417 | -0.013         | 0.915 | -0.096                                                                    | 0.510 |
| HOMA-IR                   | -0.083            | 0.342 | -0.072                                                                       | 0.474 | -0.026         | 0.831 | 0.009                                                                     | 0.950 |
| HOMA- $\beta$ (n = 128)   | -0.222            | 0.012 | -0.195                                                                       | 0.054 | -0.210         | 0.093 | -0.324                                                                    | 0.032 |
| HbA1c                     | -0.039            | 0.660 | -0.006                                                                       | 0.953 | 0.031          | 0.800 | 0.115                                                                     | 0.436 |
| Total cholesterol, mg/dL  | -0.023            | 0.793 | -0.071                                                                       | 0.480 | -0.252         | 0.034 | -0.240                                                                    | 0.096 |
| Triglycerides, mg/dL      | -0.108            | 0.218 | -0.117                                                                       | 0.244 | -0.214         | 0.074 | -0.415                                                                    | 0.003 |
| HDL, mg/dL                | -0.116            | 0.186 | -0.078                                                                       | 0.439 | 0.071          | 0.556 | 0.147                                                                     | 0.314 |
| LDL, mg/dL                | 0.090             | 0.304 | 0.010                                                                        | 0.918 | -0.255         | 0.032 | -0.256                                                                    | 0.076 |
| Castelli's risk index-I   | 0.102             | 0.246 | 0.018                                                                        | 0.854 | -0.292         | 0.013 | -0.279                                                                    | 0.053 |
| Castelli's risk index-II  | 0.132             | 0.131 | 0.024                                                                        | 0.814 | -0.276         | 0.020 | -0.284                                                                    | 0.048 |
| hs-CRP, mg/dL             | -0.151            | 0.085 | -0.121                                                                       | 0.227 | 0.006          | 0.962 | -0.102                                                                    | 0.491 |
| Ionized calcium, mmol/L   | 0.026             | 0.771 | -0.011                                                                       | 0.917 | -0.113         | 0.349 | 0.089                                                                     | 0.541 |
| Alkaline phosphatase, U/L | -0.114            | 0.194 | -0.081                                                                       | 0.422 | -0.070         | 0.561 | 0.080                                                                     | 0.587 |
| PTH, pg/mL                | -0.089            | 0.311 | -0.132                                                                       | 0.189 | 0.132          | 0.273 | -0.038                                                                    | 0.795 |

25(OH)D: 25 hydroxyvitamin D; High-density lipoprotein (HDL-c); HDL: high-density lipoprotein; LDL: low-density lipoprotein; hs-CRP: High-Sensitivity C-Reactive Protein; PTH: parathyroid hormone.

<https://doi.org/10.1371/journal.pone.0298862.t003>

the sequestration of some circulating 25(OH)D from blood [27]. Other potential factors contributing to the observed sex-related difference in vitamin D concentration include the lower frequency of sunscreen use among males, which has been reported to be three times lower in boys, and the greater frequency of outdoor physical activity among males, allowing for increased endogenous production of vitamin D [24, 28]. However, a more comprehensive examination of the impact of sex on vitamin D status is necessary, and future studies should account for confounding variables such as seasonality and body fat percentage.

Our study revealed unexpected differences in vitamin D concentrations between seasons, with higher 25(OH)D levels observed in winter than in spring. This observation contradicts the assumption that colder seasons would lead to lower vitamin D status due to reduced sunlight exposure for endogenous production. However, it is worth noting that in low-latitude countries, such as Brazil, sunlight radiation is considered high throughout the year. During winter in Brazil, the UV Index may reach very high values (UV Index between 8 and 11) in practically all the North, Northeast, and Centre regions [29]. For example, Brasília, the city where the study was carried out, which is located in the Central region of Brazil. In contrast, in the Southeast of the country, medium and high UV Index are expected on clear sky days [30]. Additionally, mid-year school vacations in Brazil occur during the winter months (June-July), which may lead to increased sunlight exposure during recreational activities among young individuals. Thus, in low-latitude countries, the duration and frequency of sunlight exposure may be more influential than the season [21].

Another potential contributing factor to the unexpected differences in vitamin D concentrations between seasons in our study may be the typical climate in the study region. The rainy period occurs from November to April (mainly spring-summer), whereas from May to September (mainly autumn-winter), the region experiences drier conditions with fewer clouds

[29]. This may lead to higher sunlight exposure during autumn and winter, as it would allow for more outdoor activities. Conversely, a higher presence of clouds and rain during the summer may reduce the production of endogenous vitamin D due to the reduced amount of ultraviolet B radiation that reaches the Earth's surface and skin. Therefore, the unique combination of lifestyle habits and climate in Brazil may explain the higher levels of 25(OH)D observed during winter in our study.

Vitamin D and its metabolites have been shown to regulate lipid profiles through various mechanisms [28]. Recent discussions have drawn attention to the hypothesis that significant health outcomes may be associated with 25(OH)D concentrations only in cases of vitamin D deficiency and insufficiency, rather than in individuals with adequate vitamin D status [30, 31]. This is a crucial consideration for research in terms of sampling and data analysis. Consistent with previous observational studies [32, 33], our findings demonstrate an inverse correlation between serum 25(OH)D concentrations and triglyceride levels in individuals with vitamin D deficiency and insufficiency, although this association was observed only among young men. Higher vitamin D levels could provide a preventive effect by increasing intestinal calcium absorption, which decreases triglyceride synthesis in the liver [34]. Vitamin D also appears to play a crucial role in total cholesterol by increasing serum calcium levels, stimulating the secretion of bile salts, and reducing total cholesterol [34]. In this study, our analysis of all men revealed that higher 25(OH)D concentrations correlated with lower total cholesterol levels, providing further support for a potential protective role of vitamin D in regulating lipid profiles.

Recent studies have also investigated the association between serum vitamin D concentrations and glycemic regulation, as well as the onset of type II diabetes [35–37]. In a cross-sectional study of healthy Mexican young individuals, a negative correlation was found between vitamin D status and HOMA-IR and HOMA- $\beta$ . When only individuals with deficient and insufficient levels of 25(OH)D were analyzed, those with vitamin D concentrations < 20 ng/mL were twice as likely to present insulin resistance (multivariate logistic regression OR = 2.1; 95% CI: 1.0, 9.5; p-trend 0.055) [11]. Lower 25(OH)D levels have also been linked to impaired glucose-stimulated insulin secretion and  $\beta$ -cell function, contributing to hyperglycemia in individuals with type 2 diabetes [37]. In our study, lower 25(OH)D concentrations were significantly correlated with higher HOMA- $\beta$  in young men with inadequate vitamin D status, suggesting an increase in insulin secretory function. This result, accompanied by mean plasma glucose within the normal range in the groups with vitamin D insufficiency and deficiency, might indicate an early phase of insulin resistance [38, 39]. This stage is characterized by increased insulin levels as a compensatory mechanism to regulate plasma glucose concentrations [40]. Therefore, hyperglycemia manifests only when the function of pancreatic  $\beta$ -cells decreases [40]. Our findings suggest that lower serum vitamin D levels may be related to the early phase of insulin resistance in young men with inadequate vitamin D levels.

The current study had several strengths, including the collection of data in different seasons, allowing for the investigation of seasonal differences and the analysis of the relationship between vitamin D concentrations and various biochemical markers. However, there were also limitations, including the cross-sectional design, which precludes the establishment of causality between vitamin D status and the analysed biochemical parameters. Additionally, the lack of data on body composition, dietary and supplement intake, and sun exposure limited the discussion of the observed results. Another limitation is the non-representative sample, although all participants resided in the same city (latitude: 25°S) and were exposed to the same sunlight incidence.

In conclusion, our study found a high prevalence of vitamin D insufficiency and deficiency particularly in women and during the spring season and not in winter, which highlights the



importance of evaluating weather and not just season. Our findings suggest that lower vitamin D levels may be related to higher levels of HOMA- $\beta$  and triglycerides in young men, indicating a concern for insulin resistance and increased risk of cardiovascular disease in a population that is often overlooked in clinical evaluation and follow-up. Further studies with larger representative samples are needed to explore the mechanisms underlying the association between vitamin D and biochemical parameters.

## Supporting information

**S1 Table. Characteristics by vitamin D cut-off in Brazilian young women (n = 132) and men (n = 71).**

(DOCX)

**S2 Table. Linear regression models between serum 25(OH)D levels and biochemical markers in Brazilian young males and females.** Model 1: all subjects, without adjusting. Model 2: only subjects with vitamin D insufficiency or deficiency, without adjusting.

(DOCX)

## Acknowledgments

The authors thank Sabin Diagnostic Medicine<sup>®</sup> for the biochemical analysis performed in this study.

## Author Contributions

**Conceptualization:** Marcela Moraes Mendes, Maísa Miranda Araújo.

**Formal analysis:** Marcela Moraes Mendes, Maísa Miranda Araújo.

**Investigation:** Marcela Moraes Mendes, Maísa Miranda Araújo.

**Methodology:** Marcela Moraes Mendes, Maísa Miranda Araújo.

**Project administration:** Kênia Mara Baiocchi de Carvalho.

**Supervision:** Patrícia Borges Botelho, Kênia Mara Baiocchi de Carvalho.

**Writing – original draft:** Marcela Moraes Mendes, Maísa Miranda Araújo.

**Writing – review & editing:** Patrícia Borges Botelho, Kênia Mara Baiocchi de Carvalho.

## References

1. Holick MF. Vitamin D deficiency. *N Engl J Med.* 2007; 357(3):266–81. <https://doi.org/10.1056/NEJMra070553> PMID: 17634462
2. SBPC/ML e SBEM. Posicionamento Oficial da Sociedade Brasileira de Patologia Clínica/Medicina Laboratorial (SBPC/ML) e da Sociedade Brasileira de Endocrinologia e Metabologia (SBEM)—Intervalos de Referência da Vitamina D—25(OH)D. Available from: <https://bibliotecasbpc.org.br/index.php?P=4&C=0.2>.
3. Martínez-Zavala N, López-Sánchez GN, Vergara-Lopez A, et al. Vitamin D deficiency in Mexicans have a high prevalence: a cross-sectional analysis of the patients from the Centro Médico Nacional. *Arch Osteoporos.* 2020; 15:88. <https://doi.org/10.1007/s11657-020-00765-w> PMID: 32542548
4. Pereira-Santos M, Santos JYGD, Carvalho GQ, et al. Epidemiology of vitamin D insufficiency and deficiency in a population in a sunny country: Geospatial meta-analysis in Brazil. *Crit Rev Food Sci Nutr.* 2019; 59:2102–2109. <https://doi.org/10.1080/10408398.2018.1437711> PMID: 29420062
5. Hilger J, Friedel A, Herr R, et al. A systematic review of vitamin D status in populations worldwide. *BJN.* 2014; 111:23–45. <https://doi.org/10.1017/S0007114513001840> PMID: 23930771

6. Mendes MM, Gomes APO, Araújo MM, et al. Prevalence of vitamin D deficiency in South America: a systematic review and meta-analysis. *Nutr Rev.* 2023; 00:1–20. <https://doi.org/10.1093/nutrit/nuad010> PMID: 36882047
7. de Jongh RT, van Schoor NM, Lips P. Changes in vitamin D endocrinology during aging in adults. *Mol Cell Endocrinol.* 2017; 453:144–150. <https://doi.org/10.1016/j.mce.2017.06.005> PMID: 28602863
8. Horton-French K, Dunlop E, Lucas RM, et al. Prevalence and predictors of vitamin D deficiency in a nationally representative sample of Australian adolescents and young adults. *Eur J Clin Nutr [Internet]* Springer US; 2021; 75:1627–36. <https://doi.org/10.1038/s41430-021-00880-y> PMID: 33649524
9. Al-Khalidi B, Kimball SM, Rotondi MA, Ardern CI. Standardized serum 25-hydroxyvitamin D concentrations are inversely associated with cardiometabolic disease in U.S. adults: a cross-sectional analysis of NHANES, 2001–2010. *Nutr J.* 2017; 16:16–20. <https://doi.org/10.1186/s12937-017-0237-6> PMID: 28241878
10. Ferreira T da S, Rocha TM, Klein MRST, et al. Vitamin d deficiency is associated with insulin resistance independent of intracellular calcium, dietary calcium and serum levels of parathormone, calcitriol and calcium in premenopausal women. *Nutr Hosp Spain;* 2015; 31:1491–8. <https://doi.org/10.3305/nh.2015.31.4.8490> PMID: 25795932
11. Denova-Gutiérrez E, Muñoz-Aguirre P, López D, et al. Low serum vitamin D concentrations are associated with insulin resistance in Mexican children and adolescents. *Nutrients* 2019; 11:2109–2115. <https://doi.org/10.3390/nu11092109> PMID: 31491877
12. Queiroz DJM, Silva AS, Dinis ADS, et al. Vitamin D insufficiency/deficiency and its association with cardiometabolic risk factors in Brazilian adolescents. *Nutr Hosp Spain;* 2019; 36:142–8. <https://doi.org/10.20960/nh.1884> PMID: 30836756
13. Fu Z, Xu C, Shu Y, et al. Serum 25-hydroxyVitamin D is associated with obesity and metabolic parameters in US children. *Public Health Nutr.* 2020; 23:1214–1222. <https://doi.org/10.1017/S1368980019001137> PMID: 31120008
14. Yarparvar A, Elmadfa I, Djazayery A, et al. The Association of Vitamin D Status with Lipid Profile and Inflammation Biomarkers in Healthy Adolescents. *Nutrients.* 2020; 12:590–604. <https://doi.org/10.3390/nu12020590> PMID: 32102427
15. Kim MH, Lee J, Ha J, et al. Gender specific association of parathyroid hormone and vitamin D with metabolic syndrome in population with preserved renal function. *Sci Rep.* 2018; 8(1):1149. <https://doi.org/10.1038/s41598-017-17397-9> PMID: 29348466
16. Wierzbicka A., & Oczkovicz M. Sex differences in vitamin D metabolism, serum levels and action. *BJN.* 2022; 128:2115–2130. <https://doi.org/10.1017/S0007114522000149> PMID: 35042577
17. Joukar F, Asgharnezhad M, Naghipour M, et al. Gender-related differences in the association of serum levels of vitamin D with body mass index in northern Iranian population: the PERSIAN Guilan Cohort Study (PGCS). *BMC Nutr.* 2022; 8(1):146. <https://doi.org/10.1186/s40795-022-00637-1> PMID: 36482384
18. Wortsman J., Matsuoka L.Y., Chen T.C., Lu Z., Holick M.F. Decreased bioavailability of vitamin D in obesity. *Am. J. Clin. Nutr.* 2000; 72:690–693. <https://doi.org/10.1093/ajcn/72.3.690> PMID: 10966885
19. Muscogiuri G, Barrea L, Somma CD, et al. Sex Differences of Vitamin D Status across BMI Classes: An Observational Prospective Cohort Study. *Nutrients.* 2019; 11(12):3034. <https://doi.org/10.3390/nu11123034> PMID: 31842281
20. Pasing Y, Fenton CF, Jorde R, et al. Changes in the human transcriptome upon vitamin D supplementation. *J Steroid Biochem Mol Biol* 2017; 173:93–99. <https://doi.org/10.1016/j.jsbmb.2017.03.016> PMID: 28330721
21. Holick MF, Binkley NC, Bischoff-Ferrari HA, et al. Evaluation, treatment, and prevention of vitamin D deficiency: An endocrine society clinical practice guideline. *J Clin Endocrinol Metab* 2011; 96:1911–30. <https://doi.org/10.1210/jc.2011-0385> PMID: 21646368
22. Society for Adolescent Health and Medicine. Recommended vitamin D intake and management of low vitamin D status in adolescents: A position statement of the Society for Adolescent Health and Medicine. *J Adolesc Health.* 2013; 52:801–803. <https://doi.org/10.1016/j.jadohealth.2013.03.022> PMID: 23701889
23. Lopes VM, Lopes JRC, Brasileiro JPB, et al. Highly prevalence of vitamin D deficiency among Brazilian women of reproductive age. *Arch Endocrinol Metab* 2017; 61:21–27. <https://doi.org/10.1590/2359-3997000000216> PMID: 27737331
24. de Oliveira CL, Cureau FV, Cople-Rodrigues CDS, et al. Prevalence and factors associated with hypovitaminosis D in adolescents from a sunny country: Findings from the ERICA survey. *J Steroid Biochem Mol Biol.* 2020; 199:105609. <https://doi.org/10.1016/j.jsbmb.2020.105609> PMID: 32006587

25. Oskarsson V, Eliasson M, Salomaa V, et al. Influence of geographical latitude on vitamin D status: cross-sectional results from the BiomarCaRE consortium. *Br J Nutr.* 2022; 128:2208–2218. <https://doi.org/10.1017/S0007114521005080> PMID: 34933700
26. Liew AY, Cust AE. Changes in sun protection behaviours, sun exposure and shade availability among adults, children and adolescents in New South Wales, 2003–2016. *Aust N Z J Public Health.* 2021; 45:462–468. <https://doi.org/10.1111/1753-6405.13112> PMID: 34028925
27. Carrelli A, Bucovsky M, Horst R, et al. Vitamin D Storage in Adipose Tissue of Obese and Normal Weight Women. *J Bone Miner Res.* 2017; 32:237–242. <https://doi.org/10.1002/jbmr.2979> PMID: 27542960
28. Peters BS, dos Santos LC, Fisberg M, Wood RJ, Martini LA. Prevalence of vitamin D insufficiency in Brazilian adolescents. *Ann Nutr Metab.* 2009; 54:15–21. <https://doi.org/10.1159/000199454> PMID: 19194104
29. Surdu AM, Pînzariu O, Ciobanu DM, Negru AG, Căinap SS, Lazea C, et al. Vitamin D and Its Role in the Lipid Metabolism and the Development of Atherosclerosis. *Biomedicines.* 2021; 9:172–181. <https://doi.org/10.3390/biomedicines9020172> PMID: 33572397
30. Corrêa Mde P. Solar ultraviolet radiation: properties, characteristics and amounts observed in Brazil and South America. *An Bras Dermatol.* 2015; 90:297–313. <https://doi.org/10.1590/abd1806-4841.20154089> PMID: 26131858
31. Bouillon R, Marcocci C, Carmeliet G, et al. Skeletal and Extraskelatal Actions of Vitamin D: Current Evidence and Outstanding Questions. *Endocr Rev.* 2019; 40:1109–1151. <https://doi.org/10.1210/er.2018-00126> PMID: 30321335
32. Gagnon C, Lu ZX, Magliano DJ, et al. Low serum 25-hydroxyvitamin D is associated with increased risk of the development of the metabolic syndrome at five years: results from a national, population-based prospective study (The Australian Diabetes, Obesity and Lifestyle Study: AusDiab). *J Clin Endocrinol Metab.* 2012; 97:1953–1961. <https://doi.org/10.1210/jc.2011-3187> PMID: 22442263
33. Skaaby T, Husemoen LL, Pisinger C, et al. Vitamin D status and changes in cardiovascular risk factors: a prospective study of a general population. *Cardiology.* 2012; 123:62–70. <https://doi.org/10.1159/000341277> PMID: 22986625
34. Wang Y, Si S, Liu J, et al. The Associations of Serum Lipids with Vitamin D Status. *PLoS One.* 2016; 11(10):e0165157. <https://doi.org/10.1371/journal.pone.0165157> PMID: 27768777
35. Hyppönen E, Läärä E, Reunanen A, Järvelin MR, Virtanen SM. Intake of vitamin D and risk of type 1 diabetes: a birth-cohort study. *Lancet.* 2001; 358:1500–1503. [https://doi.org/10.1016/S0140-6736\(01\)06580-1](https://doi.org/10.1016/S0140-6736(01)06580-1) PMID: 11705562
36. Tramunt B, Smati S, Grandgeorge N, et al. Sex differences in metabolic regulation and diabetes susceptibility. *Diabetologia.* 2020; 63:453–461. <https://doi.org/10.1007/s00125-019-05040-3> PMID: 31754750
37. Yang Y, Zhang X, Bao M, et al. Effect of serum 25-hydroxyvitamin D3 on insulin resistance and  $\beta$ -cell function in newly diagnosed type 2 diabetes patients. *J Diabetes Investig.* 2016; 7:226–232. <https://doi.org/10.1111/jdi.12381> PMID: 27042275
38. Ehrampoush E, Mirzay Razzaz J, Arjmand H, et al. The association of vitamin D levels and insulin resistance. *Clin Nutr ESPEN.* 2021; 42:325–332. <https://doi.org/10.1016/j.clnesp.2021.01.012> PMID: 33745601
39. Chiu KC, Chu A, Go VL, Saad MF. Hypovitaminosis D is associated with insulin resistance and beta cell dysfunction. *Am J Clin Nutr.* 2004; 79:820–825. <https://doi.org/10.1093/ajcn/79.5.820> PMID: 15113720
40. Thomas DD, Corkey BE, Istfan NW, Apovian CM. Hyperinsulinemia: An Early Indicator of Metabolic Dysfunction. *J Endocr Soc.* 2019; 3:1727–1747. <https://doi.org/10.1210/je.2019-00065> PMID: 31528832
